# Supplementary material
Source: Springer Nature journal article supplement (https://www.springermedizin.de/resource/supplementary/13075_2004_1362_MOESM2_ESM.pdf/9689606)

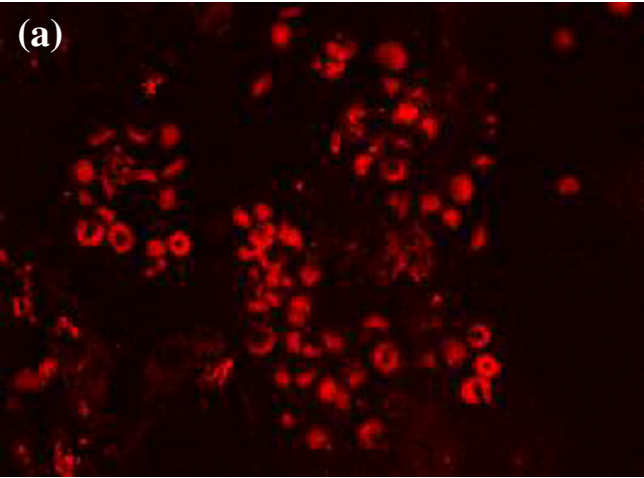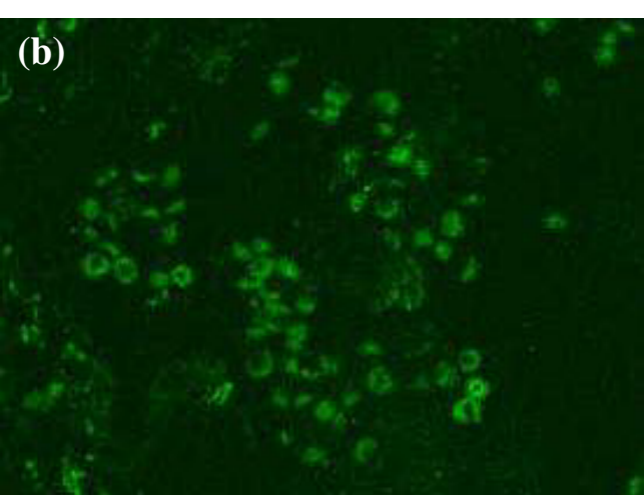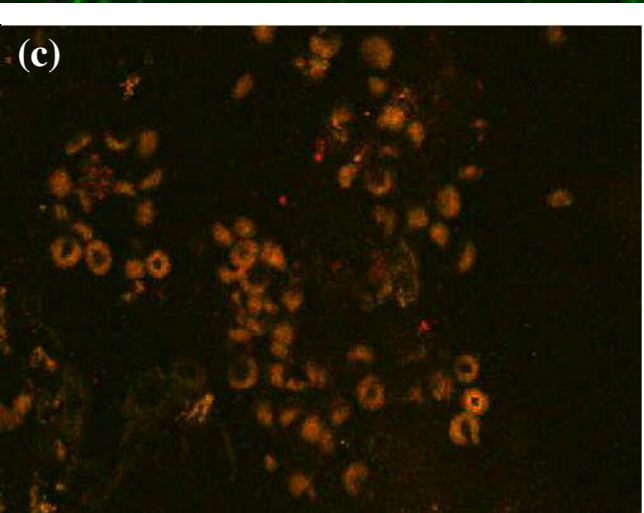

20  $\mu\text{m}$

Supplement: MOESM2 [file 9689606]
